# Supplementary material
Source: PubMed Central journal article supplement (PMC8758827)
Supplement: 13197_2021_4988_MOESM1_ESM.pdf [file 13197_2021_4988_MOESM1_ESM.pdf]

Auto-Scaled Chromatogram

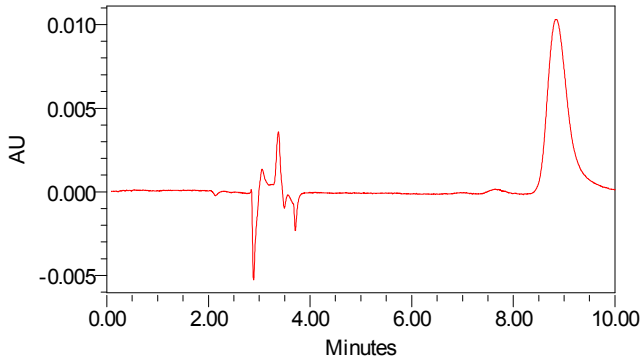

Auto-Scaled Chromatogram

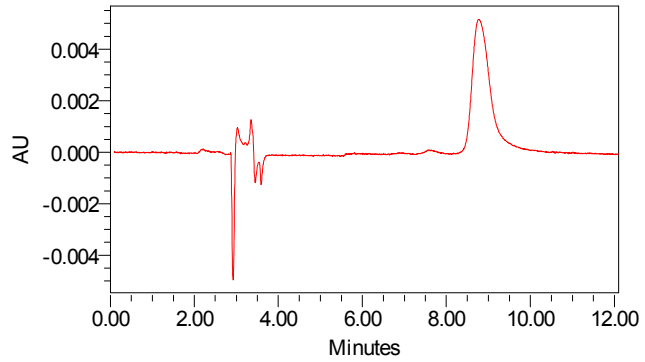

Auto-Scaled Chromatogram

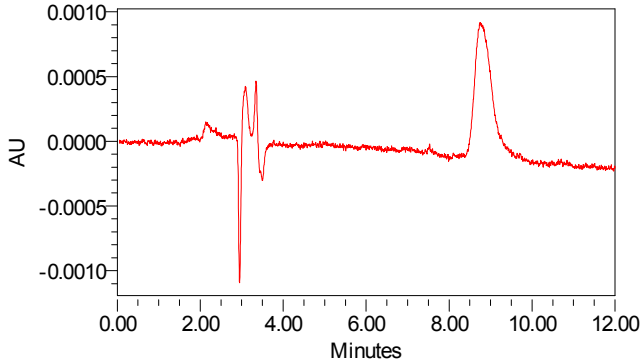

Auto-Scaled Chromatogram

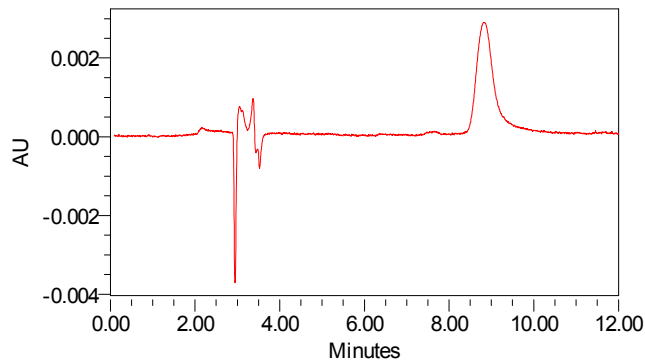

Error Log

Error - loaded the wrong type of Chrom channel (2D vs. 3D)!  
 Error - loaded the wrong type of Chrom channel (2D vs. 3D)!  
 Error - loaded the wrong type of Chrom channel (2D vs. 3D)!  
 Error - loaded the wrong type of Chrom channel (2D vs. 3D)!  
 Summary Table group contains information that doesn't match the data being reported.

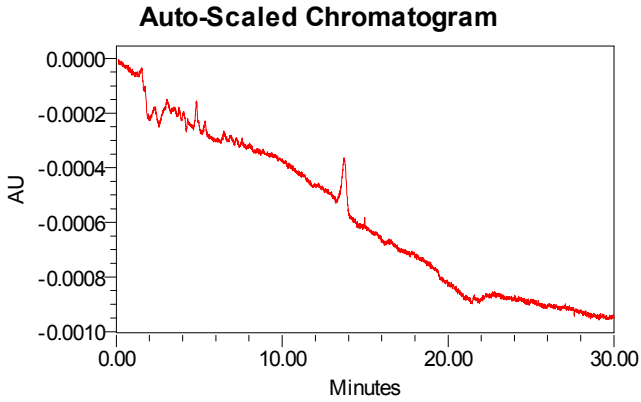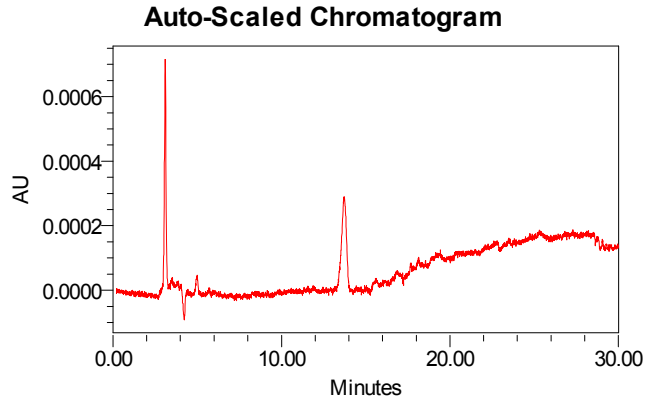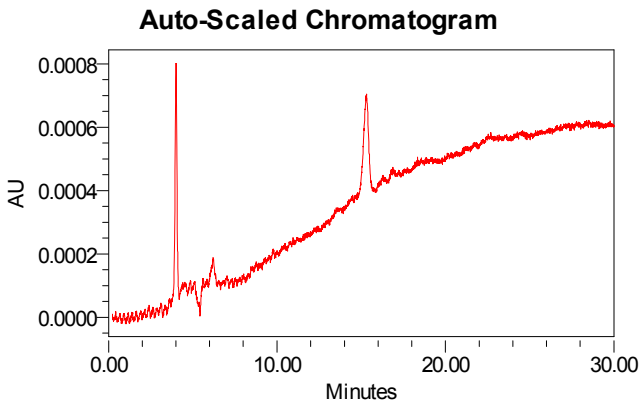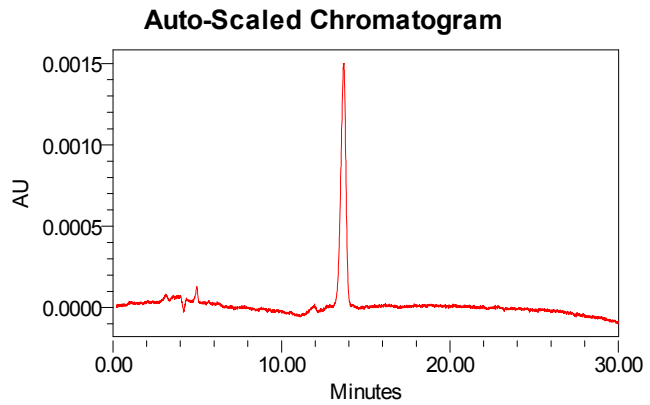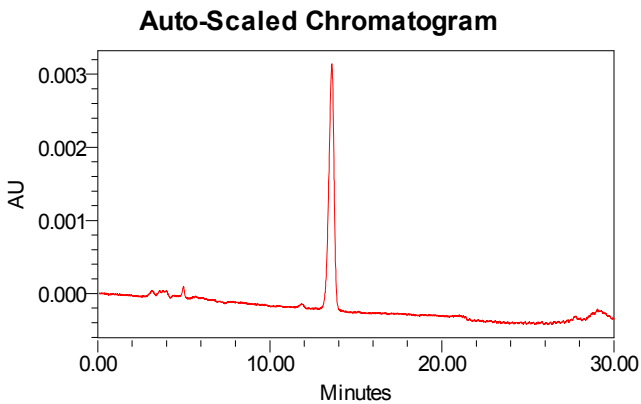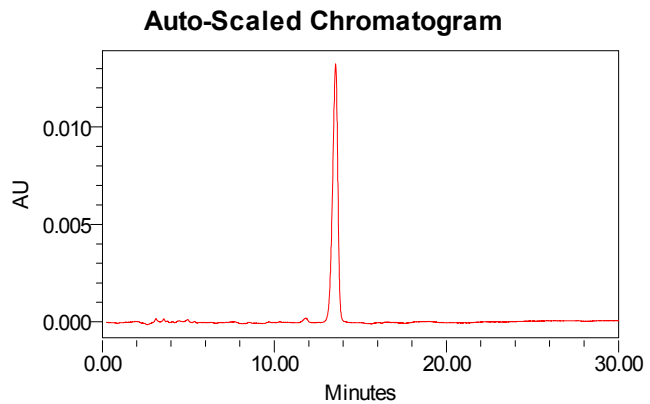

### Auto-Scaled Chromatogram

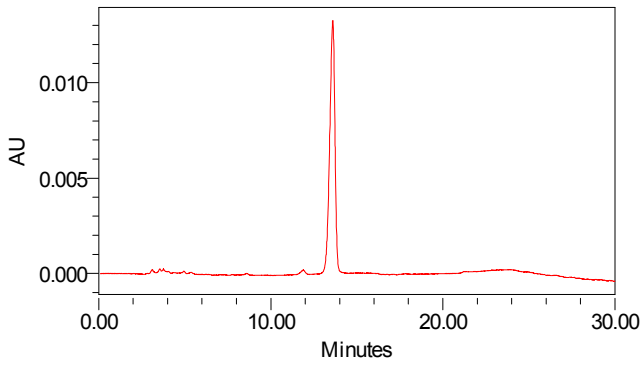

#### Error Log

Error - loaded the wrong type of Chrom channel (2D vs. 3D)!

Error - loaded the wrong type of Chrom channel (2D vs. 3D)!

Error - loaded the wrong type of Chrom channel (2D vs. 3D)!

Error - loaded the wrong type of Chrom channel (2D vs. 3D)!

Error - loaded the wrong type of Chrom channel (2D vs. 3D)!

Error - loaded the wrong type of Chrom channel (2D vs. 3D)!

Error - loaded the wrong type of Chrom channel (2D vs. 3D)!

Summary Table group contains information that doesn't match the data being reported.
